# Supplementary material for: Linking thermodynamics and kinetics to assess pathway reversibility in anaerobic bioprocesses
Source: Royal Society of Chemistry journal article supplement (doi:10.1039/c3ee42754d), 2013-01-01
Supplement: c3ee42754d.xlsx [file c3ee42754d.xlsx]

## Sheet: Figure 1.a for H2 =1e-6 bar
																																				RESULTS
	Ac- + H+ + 2H2O → 4H2 + 2CO2											IT.	Acetate	AcetylPi	AcetylCoA	Methyl-THF	Methylene-THF	Methenyl-THF	Formyl-THF	Formate	CO	CO2	THF	Pi	CoA	ratio ATP/ADP	TOTAL THF	TOTAL Pi	TOTAL CoA	Check THF	Check Pi	Check CoA	Global Energy	Protons translocated		Ac-	Ac-Pi	Ac-CoA	Methyl-THF	Methylene-THF	Methenyl-THF	Formyl-THF	Formate	CO2	Ac-CoA	CO	CO2
												1	0.01	21.7154	2.82633	3.59922e-06	3.32023e-07	0.000135	2.68858e-05	5.82771e-10	5.97977e-06	0.01	1.01	1.02	1.01	1572.56	1.01017	38.471	3.83633	NO	NO	NO	-53.1285	2.7532		-2	-2.24825	-2.13269	-7.44818	-8.48322	-5.87406	-6.57487	-9.2345	-2	-2.13269	-5.22332	-2
	CONDITIONS CONSIDERED				DG0 (kJ/mol)			Maximum (M) for				2	0.01	0.0112892	0.00736727	3.563e-08	3.28681e-09	1.33641e-06	2.66153e-07	5.82771e-10	5.97977e-06	0.01	0.00999836	0.00053027	0.00263273	0.817529	0.01	0.0299948	0.01	NO	NO	YES
	T, P, Concentrations of products and substrates				for each reaction in the fig.			conserved moieties				3	0.01	0.00752747	0.00736727	3.563e-08	3.28681e-09	1.33641e-06	2.66153e-07	5.82771e-10	5.97977e-06	0.01	0.00999836	0.000353575	0.00263273	0.545114	0.01	0.0233322	0.01	YES	NO	YES
	CO2	0.01	bar		1	-0.8		maxTHF	0.01			4	0.01	0.00645243	0.00736727	3.563e-08	3.28681e-09	1.33641e-06	2.66153e-07	5.82771e-10	5.97977e-06	0.01	0.00999836	0.000303079	0.00263273	0.467263	0.01	0.0214281	0.01	YES	NO	YES
	H2	1e-06	bar		2	5.03		maxPi	0.02			5	0.01	0.00602239	0.00736727	3.563e-08	3.28681e-09	1.33641e-06	2.66153e-07	5.82771e-10	5.97977e-06	0.01	0.00999836	0.000282879	0.00263273	0.436121	0.01	0.0206665	0.01	YES	NO	YES
	Acetate	0.01	M		3+4	63.46		maxCoA	0.01			6	0.01	0.00582817	0.00736727	3.563e-08	3.28681e-09	1.33641e-06	2.66153e-07	5.82771e-10	5.97977e-06	0.01	0.00999836	0.000273757	0.00263273	0.422057	0.01	0.0203225	0.01	YES	NO	YES
	H+	1e-07	M		5	61.9538						7	0.01	0.00573569	0.00736727	3.563e-08	3.28681e-09	1.33641e-06	2.66153e-07	5.82771e-10	5.97977e-06	0.01	0.00999836	0.000269412	0.00263273	0.415359	0.01	0.0201587	0.01	YES	NO	YES
	T	298.15	K		6	4.9		ratios for e-carriers				8	0.01	0.00569053	0.00736727	3.563e-08	3.28681e-09	1.33641e-06	2.66153e-07	5.82771e-10	5.97977e-06	0.01	0.00999836	0.000267292	0.00263273	0.412089	0.01	0.0200787	0.01	YES	NO	YES
					7	43.9538		considering theoretical eq. w H2				9	0.01	0.00566822	0.00736727	3.563e-08	3.28681e-09	1.33641e-06	2.66153e-07	5.82771e-10	5.97977e-06	0.01	0.00999836	0.000266244	0.00263273	0.410474	0.01	0.0200392	0.01	YES	NO	YES
	R	0.008314	kJ/mol K		8	8.4		ratio NADH/NAD+		0.00151563		10	0.01	0.00565714	0.00736727	3.563e-08	3.28681e-09	1.33641e-06	2.66153e-07	5.82771e-10	5.97977e-06	0.01	0.00999836	0.000265723	0.00263273	0.409671	0.01	0.0200196	0.01	YES	NO	YES
					9	-21.5		ratio NADPH/NADP+		0.000340678		11	0.01	0.00565161	0.00736727	3.563e-08	3.28681e-09	1.33641e-06	2.66153e-07	5.82771e-10	5.97977e-06	0.01	0.00999836	0.000265463	0.00263273	0.40927	0.01	0.0200098	0.01	YES	NO	YES
	DG ATP	50	kJ/mol		10	38.92		ratio Fdred/Fdox		2.1125e-10		12	0.01	0.00564885	0.00736727	3.563e-08	3.28681e-09	1.33641e-06	2.66153e-07	5.82771e-10	5.97977e-06	0.01	0.00999836	0.000265333	0.00263273	0.40907	0.01	0.0200049	0.01	YES	NO	YES
					NADH(oxid)	-21.8						13	0.01	0.00564747	0.00736727	3.563e-08	3.28681e-09	1.33641e-06	2.66153e-07	5.82771e-10	5.97977e-06	0.01	0.00999836	0.000265269	0.00263273	0.408971	0.01	0.0200024	0.01	YES	NO	YES
	ψ	0.2	V		NADPH(oxid)	-25.5						14	0.01	0.00564678	0.00736727	3.563e-08	3.28681e-09	1.33641e-06	2.66153e-07	5.82771e-10	5.97977e-06	0.01	0.00999836	0.000265236	0.00263273	0.408921	0.01	0.0200012	0.01	YES	NO	YES
	F	96.485	kC/mole		Fd(oxid)	-76.2						15	0.01	0.00564643	0.00736727	3.563e-08	3.28681e-09	1.33641e-06	2.66153e-07	5.82771e-10	5.97977e-06	0.01	0.00999836	0.00026522	0.00263273	0.408896	0.01	0.0200006	0.01	YES	NO	YES
	∆mH+	-19.297	kJ/mol		ATP (production)	-8.15						16	0.01	0.00564626	0.00736727	3.563e-08	3.28681e-09	1.33641e-06	2.66153e-07	5.82771e-10	5.97977e-06	0.01	0.00999836	0.000265212	0.00263273	0.408883	0.01	0.0200003	0.01	YES	NO	YES
					TOTAL	55.3177						17	0.01	0.00564618	0.00736727	3.563e-08	3.28681e-09	1.33641e-06	2.66153e-07	5.82771e-10	5.97977e-06	0.01	0.00999836	0.000265208	0.00263273	0.408877	0.01	0.0200002	0.01	YES	NO	YES
												18	0.01	0.00564613	0.00736727	3.563e-08	3.28681e-09	1.33641e-06	2.66153e-07	5.82771e-10	5.97977e-06	0.01	0.00999836	0.000265206	0.00263273	0.408874	0.01	0.0200001	0.01	YES	NO	YES
												19	0.01	0.00564611	0.00736727	3.563e-08	3.28681e-09	1.33641e-06	2.66153e-07	5.82771e-10	5.97977e-06	0.01	0.00999836	0.000265205	0.00263273	0.408872	0.01	0.02	0.01	YES	NO	YES
												20	0.01	0.0056461	0.00736727	3.563e-08	3.28681e-09	1.33641e-06	2.66153e-07	5.82771e-10	5.97977e-06	0.01	0.00999836	0.000265204	0.00263273	0.408871	0.01	0.02	0.01	YES	NO	YES
												21	0.01	0.00564609	0.00736727	3.563e-08	3.28681e-09	1.33641e-06	2.66153e-07	5.82771e-10	5.97977e-06	0.01	0.00999836	0.000265204	0.00263273	0.408871	0.01	0.02	0.01	YES	NO	YES
												22	0.01	0.00564609	0.00736727	3.563e-08	3.28681e-09	1.33641e-06	2.66153e-07	5.82771e-10	5.97977e-06	0.01	0.00999836	0.000265204	0.00263273	0.408871	0.01	0.02	0.01	YES	NO	YES
												23	0.01	0.00564609	0.00736727	3.563e-08	3.28681e-09	1.33641e-06	2.66153e-07	5.82771e-10	5.97977e-06	0.01	0.00999836	0.000265204	0.00263273	0.408871	0.01	0.02	0.01	YES	NO	YES
												24	0.01	0.00564609	0.00736727	3.563e-08	3.28681e-09	1.33641e-06	2.66153e-07	5.82771e-10	5.97977e-06	0.01	0.00999836	0.000265204	0.00263273	0.408871	0.01	0.02	0.01	YES	NO	YES
												25	0.01	0.00564609	0.00736727	3.563e-08	3.28681e-09	1.33641e-06	2.66153e-07	5.82771e-10	5.97977e-06	0.01	0.00999836	0.000265204	0.00263273	0.408871	0.01	0.02	0.01	YES	NO	YES
												26	0.01	0.00564609	0.00736727	3.563e-08	3.28681e-09	1.33641e-06	2.66153e-07	5.82771e-10	5.97977e-06	0.01	0.00999836	0.000265204	0.00263273	0.408871	0.01	0.02	0.01	YES	NO	YES
												27	0.01	0.00564609	0.00736727	3.563e-08	3.28681e-09	1.33641e-06	2.66153e-07	5.82771e-10	5.97977e-06	0.01	0.00999836	0.000265204	0.00263273	0.408871	0.01	0.02	0.01	YES	NO	YES
												28	0.01	0.00564609	0.00736727	3.563e-08	3.28681e-09	1.33641e-06	2.66153e-07	5.82771e-10	5.97977e-06	0.01	0.00999836	0.000265204	0.00263273	0.408871	0.01	0.02	0.01	YES	NO	YES
												29	0.01	0.00564609	0.00736727	3.563e-08	3.28681e-09	1.33641e-06	2.66153e-07	5.82771e-10	5.97977e-06	0.01	0.00999836	0.000265204	0.00263273	0.408871	0.01	0.02	0.01	YES	NO	YES
												30	0.01	0.00564609	0.00736727	3.563e-08	3.28681e-09	1.33641e-06	2.66153e-07	5.82771e-10	5.97977e-06	0.01	0.00999836	0.000265204	0.00263273	0.408871	0.01	0.02	0.01	YES	NO	YES
												31	0.01	0.00564609	0.00736727	3.563e-08	3.28681e-09	1.33641e-06	2.66153e-07	5.82771e-10	5.97977e-06	0.01	0.00999836	0.000265204	0.00263273	0.408871	0.01	0.02	0.01	YES	NO	YES
												32	0.01	0.00564609	0.00736727	3.563e-08	3.28681e-09	1.33641e-06	2.66153e-07	5.82771e-10	5.97977e-06	0.01	0.00999836	0.000265204	0.00263273	0.408871	0.01	0.02	0.01	YES	NO	YES
												33	0.01	0.00564609	0.00736727	3.563e-08	3.28681e-09	1.33641e-06	2.66153e-07	5.82771e-10	5.97977e-06	0.01	0.00999836	0.000265204	0.00263273	0.408871	0.01	0.02	0.01	YES	NO	YES
												34	0.01	0.00564609	0.00736727	3.563e-08	3.28681e-09	1.33641e-06	2.66153e-07	5.82771e-10	5.97977e-06	0.01	0.00999836	0.000265204	0.00263273	0.408871	0.01	0.02	0.01	YES	NO	YES
												35	0.01	0.00564609	0.00736727	3.563e-08	3.28681e-09	1.33641e-06	2.66153e-07	5.82771e-10	5.97977e-06	0.01	0.00999836	0.000265204	0.00263273	0.408871	0.01	0.02	0.01	YES	NO	YES
												36	0.01	0.00564609	0.00736727	3.563e-08	3.28681e-09	1.33641e-06	2.66153e-07	5.82771e-10	5.97977e-06	0.01	0.00999836	0.000265204	0.00263273	0.408871	0.01	0.02	0.01	YES	NO	YES
												37	0.01	0.00564609	0.00736727	3.563e-08	3.28681e-09	1.33641e-06	2.66153e-07	5.82771e-10	5.97977e-06	0.01	0.00999836	0.000265204	0.00263273	0.408871	0.01	0.02	0.01	YES	NO	YES
												38	0.01	0.00564609	0.00736727	3.563e-08	3.28681e-09	1.33641e-06	2.66153e-07	5.82771e-10	5.97977e-06	0.01	0.00999836	0.000265204	0.00263273	0.408871	0.01	0.02	0.01	YES	NO	YES
												39	0.01	0.00564609	0.00736727	3.563e-08	3.28681e-09	1.33641e-06	2.66153e-07	5.82771e-10	5.97977e-06	0.01	0.00999836	0.000265204	0.00263273	0.408871	0.01	0.02	0.01	YES	NO	YES
												40	0.01	0.00564609	0.00736727	3.563e-08	3.28681e-09	1.33641e-06	2.66153e-07	5.82771e-10	5.97977e-06	0.01	0.00999836	0.000265204	0.00263273	0.408871	0.01	0.02	0.01	YES	NO	YES
												41	0.01	0.00564609	0.00736727	3.563e-08	3.28681e-09	1.33641e-06	2.66153e-07	5.82771e-10	5.97977e-06	0.01	0.00999836	0.000265204	0.00263273	0.408871	0.01	0.02	0.01	YES	NO	YES
												42	0.01	0.00564609	0.00736727	3.563e-08	3.28681e-09	1.33641e-06	2.66153e-07	5.82771e-10	5.97977e-06	0.01	0.00999836	0.000265204	0.00263273	0.408871	0.01	0.02	0.01	YES	NO	YES
												43	0.01	0.00564609	0.00736727	3.563e-08	3.28681e-09	1.33641e-06	2.66153e-07	5.82771e-10	5.97977e-06	0.01	0.00999836	0.000265204	0.00263273	0.408871	0.01	0.02	0.01	YES	NO	YES
												44	0.01	0.00564609	0.00736727	3.563e-08	3.28681e-09	1.33641e-06	2.66153e-07	5.82771e-10	5.97977e-06	0.01	0.00999836	0.000265204	0.00263273	0.408871	0.01	0.02	0.01	YES	NO	YES
												45	0.01	0.00564609	0.00736727	3.563e-08	3.28681e-09	1.33641e-06	2.66153e-07	5.82771e-10	5.97977e-06	0.01	0.00999836	0.000265204	0.00263273	0.408871	0.01	0.02	0.01	YES	NO	YES
												46	0.01	0.00564609	0.00736727	3.563e-08	3.28681e-09	1.33641e-06	2.66153e-07	5.82771e-10	5.97977e-06	0.01	0.00999836	0.000265204	0.00263273	0.408871	0.01	0.02	0.01	YES	NO	YES
												47	0.01	0.00564609	0.00736727	3.563e-08	3.28681e-09	1.33641e-06	2.66153e-07	5.82771e-10	5.97977e-06	0.01	0.00999836	0.000265204	0.00263273	0.408871	0.01	0.02	0.01	YES	NO	YES
												48	0.01	0.00564609	0.00736727	3.563e-08	3.28681e-09	1.33641e-06	2.66153e-07	5.82771e-10	5.97977e-06	0.01	0.00999836	0.000265204	0.00263273	0.408871	0.01	0.02	0.01	YES	NO	YES
												49	0.01	0.00564609	0.00736727	3.563e-08	3.28681e-09	1.33641e-06	2.66153e-07	5.82771e-10	5.97977e-06	0.01	0.00999836	0.000265204	0.00263273	0.408871	0.01	0.02	0.01	YES	YES	YES

## Sheet: Figure 1.b for H2 =1e-6 bar
																																							RESULTS
	Ac- + H+ + 2H2O → 4H2 + 2CO2														IT.	Acetate	AcetylPi	AcetylCoA	Methyl-THF	Methylene-THF	Methenyl-THF	Formyl-THF	Formate	CO	CO2	THF	Pi	CoA	ratio ATP/ADP	TOTAL THF	TOTAL Pi	TOTAL CoA	Check THF	Check Pi	Check CoA	Global Energy	Translocated protons		Ac-	Ac-Pi	Ac-CoA	Methyl-THF	Methylene-THF	Methenyl-THF	Formyl-THF	Formate	CO2	Ac-CoA	CO
															1	0.01	21.7154	2.82633	0.000120502	0.0267195	0.0573278	0.0114171	2.47475e-07	1.78608e-07	0.01	1.01	1.02	1.01	1572.56	1.10558	38.471	3.83633	NO	NO	NO	-44.4255	2.3022		-2	-2.24825	-2.13269	-5.9626	-3.61676	-3.28523	-3.98604	-6.60647	-2	-2.13269	-6.7481
	CONDITIONS CONSIDERED				DG0 (kJ/mol)			Maximum (M) for				DGDis (kJ/mol)			2	0.01	0.0112892	0.00736727	1.08993e-06	0.000241678	0.000518529	0.000103268	2.47475e-07	1.78608e-07	0.01	0.00913544	0.00053027	0.00263273	0.817529	0.01	0.0299948	0.01	NO	NO	YES
	T, P, Concentrations of products and substrates				for each reaction in the fig.			conserved moieties				considered in some reactions			3	0.01	0.00752747	0.00736727	1.08993e-06	0.000241678	0.000518529	0.000103268	2.47475e-07	1.78608e-07	0.01	0.00913544	0.000353575	0.00263273	0.545114	0.01	0.0233322	0.01	YES	NO	YES
	CO2	0.01	bar		1	-0.8		maxTHF	0.01			reac. 6	-13		4	0.01	0.00645243	0.00736727	1.08993e-06	0.000241678	0.000518529	0.000103268	2.47475e-07	1.78608e-07	0.01	0.00913544	0.000303079	0.00263273	0.467263	0.01	0.0214281	0.01	YES	NO	YES
	H2	1e-06	bar		2	5.03		maxPi	0.02			reac. 9	-15		5	0.01	0.00602239	0.00736727	1.08993e-06	0.000241678	0.000518529	0.000103268	2.47475e-07	1.78608e-07	0.01	0.00913544	0.000282879	0.00263273	0.436121	0.01	0.0206665	0.01	YES	NO	YES
	Acetate	0.01	M		3+4	63.46		maxCoA	0.01						6	0.01	0.00582817	0.00736727	1.08993e-06	0.000241678	0.000518529	0.000103268	2.47475e-07	1.78608e-07	0.01	0.00913544	0.000273757	0.00263273	0.422057	0.01	0.0203225	0.01	YES	NO	YES
	H+	1e-07	M		5	61.9538									7	0.01	0.00573569	0.00736727	1.08993e-06	0.000241678	0.000518529	0.000103268	2.47475e-07	1.78608e-07	0.01	0.00913544	0.000269412	0.00263273	0.415359	0.01	0.0201587	0.01	YES	NO	YES
	T	298.15	K		6	4.9		ratios for e-carriers							8	0.01	0.00569053	0.00736727	1.08993e-06	0.000241678	0.000518529	0.000103268	2.47475e-07	1.78608e-07	0.01	0.00913544	0.000267292	0.00263273	0.412089	0.01	0.0200787	0.01	YES	NO	YES
					7	43.9538		considering theoretical eq. w H2							9	0.01	0.00566822	0.00736727	1.08993e-06	0.000241678	0.000518529	0.000103268	2.47475e-07	1.78608e-07	0.01	0.00913544	0.000266244	0.00263273	0.410474	0.01	0.0200392	0.01	YES	NO	YES
	R	0.008314	kJ/mol K		8	8.4		ratio NADH/NAD+		6.30546e-07					10	0.01	0.00565714	0.00736727	1.08993e-06	0.000241678	0.000518529	0.000103268	2.47475e-07	1.78608e-07	0.01	0.00913544	0.000265723	0.00263273	0.409671	0.01	0.0200196	0.01	YES	NO	YES
					9	-21.5		ratio NADPH/NADP+		0.000340678					11	0.01	0.00565161	0.00736727	1.08993e-06	0.000241678	0.000518529	0.000103268	2.47475e-07	1.78608e-07	0.01	0.00913544	0.000265463	0.00263273	0.40927	0.01	0.0200098	0.01	YES	NO	YES
	DG ATP	50	kJ/mol		10	38.92		ratio Fdred/Fdox		2.1125e-10					12	0.01	0.00564885	0.00736727	1.08993e-06	0.000241678	0.000518529	0.000103268	2.47475e-07	1.78608e-07	0.01	0.00913544	0.000265333	0.00263273	0.40907	0.01	0.0200049	0.01	YES	NO	YES
					NADH(oxid)	-21.8									13	0.01	0.00564747	0.00736727	1.08993e-06	0.000241678	0.000518529	0.000103268	2.47475e-07	1.78608e-07	0.01	0.00913544	0.000265269	0.00263273	0.408971	0.01	0.0200024	0.01	YES	NO	YES
	ψ	0.2	V		NADPH(oxid)	-25.5									14	0.01	0.00564678	0.00736727	1.08993e-06	0.000241678	0.000518529	0.000103268	2.47475e-07	1.78608e-07	0.01	0.00913544	0.000265236	0.00263273	0.408921	0.01	0.0200012	0.01	YES	NO	YES
	F	96.485	kC/mole		Fd(oxid)	-76.2									15	0.01	0.00564643	0.00736727	1.08993e-06	0.000241678	0.000518529	0.000103268	2.47475e-07	1.78608e-07	0.01	0.00913544	0.00026522	0.00263273	0.408896	0.01	0.0200006	0.01	YES	NO	YES
	∆mH+	-19.297	kJ/mol		ATP (production)	-8.15									16	0.01	0.00564626	0.00736727	1.08993e-06	0.000241678	0.000518529	0.000103268	2.47475e-07	1.78608e-07	0.01	0.00913544	0.000265212	0.00263273	0.408883	0.01	0.0200003	0.01	YES	NO	YES
					TOTAL	55.3177									17	0.01	0.00564618	0.00736727	1.08993e-06	0.000241678	0.000518529	0.000103268	2.47475e-07	1.78608e-07	0.01	0.00913544	0.000265208	0.00263273	0.408877	0.01	0.0200002	0.01	YES	NO	YES
															18	0.01	0.00564613	0.00736727	1.08993e-06	0.000241678	0.000518529	0.000103268	2.47475e-07	1.78608e-07	0.01	0.00913544	0.000265206	0.00263273	0.408874	0.01	0.0200001	0.01	YES	NO	YES
															19	0.01	0.00564611	0.00736727	1.08993e-06	0.000241678	0.000518529	0.000103268	2.47475e-07	1.78608e-07	0.01	0.00913544	0.000265205	0.00263273	0.408872	0.01	0.02	0.01	YES	NO	YES
															20	0.01	0.0056461	0.00736727	1.08993e-06	0.000241678	0.000518529	0.000103268	2.47475e-07	1.78608e-07	0.01	0.00913544	0.000265204	0.00263273	0.408871	0.01	0.02	0.01	YES	NO	YES
															21	0.01	0.00564609	0.00736727	1.08993e-06	0.000241678	0.000518529	0.000103268	2.47475e-07	1.78608e-07	0.01	0.00913544	0.000265204	0.00263273	0.408871	0.01	0.02	0.01	YES	NO	YES
															22	0.01	0.00564609	0.00736727	1.08993e-06	0.000241678	0.000518529	0.000103268	2.47475e-07	1.78608e-07	0.01	0.00913544	0.000265204	0.00263273	0.408871	0.01	0.02	0.01	YES	NO	YES
															23	0.01	0.00564609	0.00736727	1.08993e-06	0.000241678	0.000518529	0.000103268	2.47475e-07	1.78608e-07	0.01	0.00913544	0.000265204	0.00263273	0.408871	0.01	0.02	0.01	YES	NO	YES
															24	0.01	0.00564609	0.00736727	1.08993e-06	0.000241678	0.000518529	0.000103268	2.47475e-07	1.78608e-07	0.01	0.00913544	0.000265204	0.00263273	0.408871	0.01	0.02	0.01	YES	NO	YES
															25	0.01	0.00564609	0.00736727	1.08993e-06	0.000241678	0.000518529	0.000103268	2.47475e-07	1.78608e-07	0.01	0.00913544	0.000265204	0.00263273	0.408871	0.01	0.02	0.01	YES	NO	YES
															26	0.01	0.00564609	0.00736727	1.08993e-06	0.000241678	0.000518529	0.000103268	2.47475e-07	1.78608e-07	0.01	0.00913544	0.000265204	0.00263273	0.408871	0.01	0.02	0.01	YES	NO	YES
															27	0.01	0.00564609	0.00736727	1.08993e-06	0.000241678	0.000518529	0.000103268	2.47475e-07	1.78608e-07	0.01	0.00913544	0.000265204	0.00263273	0.408871	0.01	0.02	0.01	YES	NO	YES
															28	0.01	0.00564609	0.00736727	1.08993e-06	0.000241678	0.000518529	0.000103268	2.47475e-07	1.78608e-07	0.01	0.00913544	0.000265204	0.00263273	0.408871	0.01	0.02	0.01	YES	NO	YES
															29	0.01	0.00564609	0.00736727	1.08993e-06	0.000241678	0.000518529	0.000103268	2.47475e-07	1.78608e-07	0.01	0.00913544	0.000265204	0.00263273	0.408871	0.01	0.02	0.01	YES	NO	YES
															30	0.01	0.00564609	0.00736727	1.08993e-06	0.000241678	0.000518529	0.000103268	2.47475e-07	1.78608e-07	0.01	0.00913544	0.000265204	0.00263273	0.408871	0.01	0.02	0.01	YES	NO	YES
															31	0.01	0.00564609	0.00736727	1.08993e-06	0.000241678	0.000518529	0.000103268	2.47475e-07	1.78608e-07	0.01	0.00913544	0.000265204	0.00263273	0.408871	0.01	0.02	0.01	YES	NO	YES
															32	0.01	0.00564609	0.00736727	1.08993e-06	0.000241678	0.000518529	0.000103268	2.47475e-07	1.78608e-07	0.01	0.00913544	0.000265204	0.00263273	0.408871	0.01	0.02	0.01	YES	NO	YES
															33	0.01	0.00564609	0.00736727	1.08993e-06	0.000241678	0.000518529	0.000103268	2.47475e-07	1.78608e-07	0.01	0.00913544	0.000265204	0.00263273	0.408871	0.01	0.02	0.01	YES	NO	YES
															34	0.01	0.00564609	0.00736727	1.08993e-06	0.000241678	0.000518529	0.000103268	2.47475e-07	1.78608e-07	0.01	0.00913544	0.000265204	0.00263273	0.408871	0.01	0.02	0.01	YES	NO	YES
															35	0.01	0.00564609	0.00736727	1.08993e-06	0.000241678	0.000518529	0.000103268	2.47475e-07	1.78608e-07	0.01	0.00913544	0.000265204	0.00263273	0.408871	0.01	0.02	0.01	YES	NO	YES
															36	0.01	0.00564609	0.00736727	1.08993e-06	0.000241678	0.000518529	0.000103268	2.47475e-07	1.78608e-07	0.01	0.00913544	0.000265204	0.00263273	0.408871	0.01	0.02	0.01	YES	NO	YES
															37	0.01	0.00564609	0.00736727	1.08993e-06	0.000241678	0.000518529	0.000103268	2.47475e-07	1.78608e-07	0.01	0.00913544	0.000265204	0.00263273	0.408871	0.01	0.02	0.01	YES	NO	YES
															38	0.01	0.00564609	0.00736727	1.08993e-06	0.000241678	0.000518529	0.000103268	2.47475e-07	1.78608e-07	0.01	0.00913544	0.000265204	0.00263273	0.408871	0.01	0.02	0.01	YES	NO	YES
															39	0.01	0.00564609	0.00736727	1.08993e-06	0.000241678	0.000518529	0.000103268	2.47475e-07	1.78608e-07	0.01	0.00913544	0.000265204	0.00263273	0.408871	0.01	0.02	0.01	YES	NO	YES
															40	0.01	0.00564609	0.00736727	1.08993e-06	0.000241678	0.000518529	0.000103268	2.47475e-07	1.78608e-07	0.01	0.00913544	0.000265204	0.00263273	0.408871	0.01	0.02	0.01	YES	NO	YES
															41	0.01	0.00564609	0.00736727	1.08993e-06	0.000241678	0.000518529	0.000103268	2.47475e-07	1.78608e-07	0.01	0.00913544	0.000265204	0.00263273	0.408871	0.01	0.02	0.01	YES	NO	YES
															42	0.01	0.00564609	0.00736727	1.08993e-06	0.000241678	0.000518529	0.000103268	2.47475e-07	1.78608e-07	0.01	0.00913544	0.000265204	0.00263273	0.408871	0.01	0.02	0.01	YES	NO	YES
															43	0.01	0.00564609	0.00736727	1.08993e-06	0.000241678	0.000518529	0.000103268	2.47475e-07	1.78608e-07	0.01	0.00913544	0.000265204	0.00263273	0.408871	0.01	0.02	0.01	YES	NO	YES
															44	0.01	0.00564609	0.00736727	1.08993e-06	0.000241678	0.000518529	0.000103268	2.47475e-07	1.78608e-07	0.01	0.00913544	0.000265204	0.00263273	0.408871	0.01	0.02	0.01	YES	NO	YES
															45	0.01	0.00564609	0.00736727	1.08993e-06	0.000241678	0.000518529	0.000103268	2.47475e-07	1.78608e-07	0.01	0.00913544	0.000265204	0.00263273	0.408871	0.01	0.02	0.01	YES	NO	YES
															46	0.01	0.00564609	0.00736727	1.08993e-06	0.000241678	0.000518529	0.000103268	2.47475e-07	1.78608e-07	0.01	0.00913544	0.000265204	0.00263273	0.408871	0.01	0.02	0.01	YES	NO	YES
															47	0.01	0.00564609	0.00736727	1.08993e-06	0.000241678	0.000518529	0.000103268	2.47475e-07	1.78608e-07	0.01	0.00913544	0.000265204	0.00263273	0.408871	0.01	0.02	0.01	YES	NO	YES
															48	0.01	0.00564609	0.00736727	1.08993e-06	0.000241678	0.000518529	0.000103268	2.47475e-07	1.78608e-07	0.01	0.00913544	0.000265204	0.00263273	0.408871	0.01	0.02	0.01	YES	NO	YES
															49	0.01	0.00564609	0.00736727	1.08993e-06	0.000241678	0.000518529	0.000103268	2.47475e-07	1.78608e-07	0.01	0.00913544	0.000265204	0.00263273	0.408871	0.01	0.02	0.01	YES	YES	YES
[truncated: 1 more columns]
